# Supplementary material
Source: PubMed Central journal article supplement (PMC8453239)
Supplement: btaa195_supplementary_data.pdf [file btaa195_supplementary_data.pdf]

## S1. Data used

Table 1: CLASH and CLEAR-CLIP data before and after processing

|            | miRNAs | Targets | Interactions | miRNAs<br>(after<br>processing) | Targets<br>(after<br>processing) | Interactions<br>(after<br>processing) |
|------------|--------|---------|--------------|---------------------------------|----------------------------------|---------------------------------------|
| CLASH      | 399    | 7390    | 18514        | 399                             | 7181                             | 18041                                 |
| CLEAR-CLIP | 542    | 32569   | 32712        | 451                             | 9449                             | 20094                                 |

Table 2: Training and test data

|                                                                                              | miRNAs | Interactions | Training data | Test data |
|----------------------------------------------------------------------------------------------|--------|--------------|---------------|-----------|
| Target-enriched CLASH dataset (with at least 50 interactions for each miRNA)                 | 77     | 15390        | 12312         | 3078      |
| Energy-filtered CLASH dataset (with at least 15 mol/kcal and 20 interactions for each miRNA) | 122    | 16209        | 12967         | 3242      |

Table 3: 10-fold Cross validation results on the training data using both individual and general models

|                         | Training data | Test data | F1<br>(individual<br>model) | F1<br>(general<br>model) | Recall<br>(individual<br>model) | Recall<br>(general<br>model) |
|-------------------------|---------------|-----------|-----------------------------|--------------------------|---------------------------------|------------------------------|
| Target-enriched dataset | 11080         | 1232      | 0.9292                      | 0.9573                   | 0.8677                          | 0.9180                       |
|                         | 11080         | 1232      | 0.9198                      | 0.9621                   | 0.8515                          | 0.9269                       |
|                         | 11081         | 1231      | 0.9337                      | 0.9625                   | 0.8757                          | 0.9277                       |
|                         | 11081         | 1231      | 0.9258                      | 0.9638                   | 0.8619                          | 0.9301                       |
|                         | 11081         | 1231      | 0.9244                      | 0.9668                   | 0.8595                          | 0.9358                       |
|                         | 11081         | 1231      | 0.9333                      | 0.9655                   | 0.8749                          | 0.9334                       |
|                         | 11081         | 1231      | 0.9268                      | 0.9673                   | 0.8635                          | 0.9366                       |
|                         | 11081         | 1231      | 0.9221                      | 0.9594                   | 0.8554                          | 0.9220                       |
|                         | 11081         | 1231      | 0.9272                      | 0.9616                   | 0.8643                          | 0.9261                       |
|                         | 11081         | 1231      | 0.9356                      | 0.9563                   | 0.8790                          | 0.9163                       |
| Energy-filtered dataset | 11670         | 1293      | 0.9210                      | 0.9477                   | 0.8535                          | 0.9005                       |
|                         | 11670         | 1286      | 0.9201                      | 0.9460                   | 0.8520                          | 0.8975                       |
|                         | 11670         | 1286      | 0.9078                      | 0.9485                   | 0.8311                          | 0.9021                       |
|                         | 11670         | 1290      | 0.9169                      | 0.9591                   | 0.8466                          | 0.9214                       |
|                         | 11670         | 1286      | 0.9219                      | 0.9485                   | 0.8551                          | 0.9021                       |
|                         | 11670         | 1285      | 0.9124                      | 0.9587                   | 0.8389                          | 0.9206                       |
|                         | 11670         | 1290      | 0.9196                      | 0.9523                   | 0.8512                          | 0.9090                       |
|                         | 11671         | 1282      | 0.9068                      | 0.9459                   | 0.8295                          | 0.8974                       |
|                         | 11671         | 1296      | 0.9195                      | 0.9540                   | 0.8511                          | 0.9120                       |
|                         | 11671         | 1284      | 0.9155                      | 0.9561                   | 0.8441                          | 0.9159                       |

## S2. Example of the MDPS dynamic programming strategy

```

MED12L  UGCUGC-AGCUCCCUGCCCGGCGCA
          |||||  |||  ||  ||||  ||||
hsa-miR-484  ACGACAAUCG-GGAUCGGG--GCGU
  
```

Fig 1: MDPS alignment between mRNA transcript and miRNA sequence

In order to align a miRNA and target sequence using MDPS strategy, we considered a dynamic programming sequence alignment algorithm mentioned in the manuscript (Section 2.3). Given a *miRNA* ( $1 \dots i$ ) and *target* ( $1 \dots j$ ) the scores  $S[i, j, k]$  are calculated using a pretrained position weight matrix ( $w$ ) and a pretrained state transition matrix ( $t$ ). Using the definitions mentioned in the manuscript (Section 2.3), here we explain how  $S[i, j, k]$  score table is calculated using MDPS strategy with an alignment example between hsa-miR-484 and MED12L mRNA transcript mentioned in the CLASH data (Fig S1). We show how we calculated  $S[2, 2, 0]$  (Table 4) step by step.

$S[2,2,0]$  denotes the alignment between the first two nucleotides of the miRNA and the target sequences that ends with a  $\{M, N \text{ or } W\}$ . In order to calculate  $S[2,2,0]$ , we also need to calculate  $S[1,1, k]$ ,  $k \in \{0,1,2\}$ . Now from the initializations mentioned in the manuscript (Section 2.3),

$$S[1, 1, 0] = \log(w(\text{state}(1, 1), 1)) = \log(w(M, 1)) = -0.93$$

$$S[1, 1, 1] = \log(w(B_y, 1)) = -4.06$$

$$S[1, 1, 2] = -\infty$$

Now using the equations stated in the manuscript (Section 2.3) we can calculate  $S[2,2,0]$ ,

$$S[2, 2, 0] = \log(w(\text{state}(2, 2), 2)) + \max \begin{cases} S[1,1,0] + \log(t(\text{state}(1,1), \text{state}(2,2))) \\ S[1,1,1] + \log(t(B_y, \text{state}(2,2))) \\ S[1,1,2] + \log(t(B_x, \text{state}(2,2))) \end{cases}$$

$$\Rightarrow S[2, 2, 0] = \log(w(M, 2)) + \max \begin{cases} S[1,1,0] + \log(t(M, M)) \\ S[1,1,1] + \log(t(B_y, M)) \\ S[1,1,2] + \log(t(B_x, M)) \end{cases}$$

$$\Rightarrow S[2, 2, 0] = -0.54 + \max \begin{cases} -0.93 + (-0.34) \\ -4.06 + (-1.44) \\ -\infty + (-1.52) \end{cases}$$

$$\Rightarrow S[2, 2, 0] = -1.81 \text{ calculated from } S[1,1,0] \text{ as a traceback.}$$

The full alignment score table is shown in Table 5, where the traceback path is also highlighted.



### S3. Performance of MDPS

Table 6: Performance comparison between individual and general MDPS models for the two training datasets.

|                                  | Pos  | F1     | Recall | TP   | FN  |
|----------------------------------|------|--------|--------|------|-----|
| Target-enriched individual model | 2396 | 0.9337 | 0.8756 | 2098 | 298 |
| Target-enriched general model    | 2396 | 0.9664 | 0.9349 | 2240 | 156 |
| Energy-filtered individual model | 2604 | 0.9242 | 0.8591 | 2237 | 367 |
| Energy-filtered general model    | 2604 | 0.9561 | 0.9159 | 2385 | 219 |

Table 7: Performance comparison between external tools (MiRanda, RNA22 and TargetScan) alone and the external tools combined with MDPS (target-enriched).

|                                 | Positives | Predicted Positives | F1     | Precision | Recall | TP   | FP      |
|---------------------------------|-----------|---------------------|--------|-----------|--------|------|---------|
| MiRanda on CLASH                | 3078      | 20928               | 0.0463 | 0.0266    | 0.1806 | 556  | 20372   |
| MiRanda + MDPS on CLASH         | 3078      | 15953               | 0.0551 | 0.0328    | 0.1702 | 524  | 15429   |
| MiRanda on CLEAR-CLIP           | 20081     | 1857429             | 0.0017 | 0.0009    | 0.0811 | 1629 | 1855800 |
| MiRanda + MDPS on CLEAR-CLIP    | 20081     | 1491514             | 0.0020 | 0.0010    | 0.0753 | 1513 | 1490001 |
| RNA22 on CLASH                  | 3078      | 91134               | 0.0110 | 0.0057    | 0.1680 | 517  | 90617   |
| RNA22 + MDPS on CLASH           | 3078      | 68216               | 0.0137 | 0.0072    | 0.1592 | 490  | 67726   |
| RNA22 on CLEAR-CLIP             | 20084     | 3524462             | 0.0004 | 0.0002    | 0.0367 | 738  | 3523724 |
| RNA22 + MDPS on CLEAR-CLIP      | 20084     | 2603740             | 0.0005 | 0.0003    | 0.0333 | 669  | 2603071 |
| TargetScan on CLASH             | 3078      | 38240               | 0.0220 | 0.0119    | 0.1475 | 454  | 37786   |
| TargetScan + MDPS on CLASH      | 3078      | 29700               | 0.0265 | 0.0146    | 0.1413 | 435  | 29265   |
| TargetScan on CLEAR-CLIP        | 20078     | 3925145             | 0.0012 | 0.0006    | 0.1134 | 2277 | 3922868 |
| TargetScan + MDPS on CLEAR-CLIP | 20078     | 3080990             | 0.0014 | 0.0007    | 0.1053 | 2114 | 3078876 |

Table 8: Performance comparison between external tools (MiRanda, RNA22 and TargetScan) alone and the external tools combined with MDPS (energy-filtered)

|                                 | Positives | Predicted Positives | F1     | Precision | Recall | TP   | FP      |
|---------------------------------|-----------|---------------------|--------|-----------|--------|------|---------|
| MiRanda on CLASH                | 3242      | 35612               | 0.0324 | 0.0177    | 0.1943 | 630  | 34982   |
| MiRanda + MDPS on CLASH         | 3242      | 27223               | 0.0382 | 0.0214    | 0.1795 | 582  | 26641   |
| MiRanda on CLEAR-CLIP           | 20081     | 1857429             | 0.0017 | 0.0009    | 0.0811 | 1629 | 1855800 |
| MiRanda + MDPS on CLEAR-CLIP    | 20081     | 1431609             | 0.0020 | 0.0010    | 0.0725 | 1455 | 1430154 |
| RNA22 on CLASH                  | 3242      | 121169              | 0.0088 | 0.0045    | 0.1693 | 549  | 120620  |
| RNA22 + MDPS on CLASH           | 3242      | 89576               | 0.0110 | 0.0057    | 0.1573 | 510  | 89066   |
| RNA22 on CLEAR-CLIP             | 20084     | 3524462             | 0.0004 | 0.0002    | 0.0367 | 738  | 3523724 |
| RNA22 + MDPS on CLEAR-CLIP      | 20084     | 2596344             | 0.0005 | 0.0003    | 0.0329 | 660  | 2595684 |
| TargetScan on CLASH             | 3242      | 67982               | 0.0146 | 0.0076    | 0.1604 | 520  | 67462   |
| TargetScan + MDPS on CLASH      | 3242      | 51784               | 0.0180 | 0.0096    | 0.1527 | 495  | 51289   |
| TargetScan on CLEAR-CLIP        | 20078     | 3925145             | 0.0012 | 0.0006    | 0.1134 | 2277 | 3922868 |
| TargetScan + MDPS on CLEAR-CLIP | 20078     | 3126308             | 0.0013 | 0.0007    | 0.1047 | 2103 | 3124205 |
